# Supplementary material
Source: PubMed Central journal article supplement (PMC5802341)
Supplement: NIHMS938251-supplement-supplement_1.pdf [file NIHMS938251-supplement-supplement_1.pdf]

# SUPPLEMENTAL MATERIAL

## **Safety and Efficacy of Remote Ischemic Preconditioning in Patients with Severe Carotid Artery Stenosis Prior to Carotid Artery Stenting: a Proof-of-concept, Randomized Controlled Trial**

Wenbo Zhao MD<sup>1</sup>, Ran Meng MD<sup>1</sup>, Chun Ma MD<sup>2</sup>, Baojun Hou MD<sup>3</sup>, Liquan Jiao MD<sup>4</sup>, Fengshui Zhu MD<sup>4</sup>, Weijuan Wu MD<sup>1</sup>, Jingfei Shi MD<sup>5</sup>, Yunxia Duan MD<sup>5</sup>, Renling Zhang MD<sup>6</sup>, Jing Zhang MD<sup>1</sup>, Yongxin Sun MD<sup>1</sup>, Hongqi Zhang MD<sup>4</sup>, Feng Ling MD<sup>4</sup>, Yuping Wang MD<sup>1</sup>, Wuwei Feng MD MS<sup>7</sup>, Yuchuan Ding MD<sup>8</sup>, Bruce Ovbiagele MD MPH<sup>7</sup>, Xunming Ji MD PhD<sup>4</sup>

<sup>1</sup>Department of Neurology, Xuanwu Hospital, Capital Medical University, Beijing, China

<sup>2</sup>Department of Surgical Intensive Care Unit, Beijing Anzhen Hospital, Capital Medical University, Beijing, China

<sup>3</sup>Department of Intensive Care Unit, Shanxian Central Hospital, Shanxian, Shandong province, China

<sup>4</sup>Department of Neurosurgery, Xuanwu Hospital, Capital Medical University, Beijing, China

<sup>5</sup>China-America Joint Institution of Neuroscience, Xuanwu Hospital, Capital Medical University, Beijing, China

<sup>6</sup>Department of Nuclear Medicine, Xuanwu Hospital, Capital Medical University, Beijing, China

<sup>7</sup>Department of Neurology, Medical University of South Carolina, Charleston, USA

<sup>8</sup>Department of Neurosurgery, Wayne State University, Detroit, USA

### **Corresponding Author:**

Xunming Ji MD PhD, Department of Neurosurgery, Xuanwu Hospital, Capital Medical University; Changchun Street, No.45, Xicheng District, Beijing, China, 100053

Email: [jixm@ccmu.edu.cn](mailto:jixm@ccmu.edu.cn); Tel: 011-86-10-8319-8952; Fax: 011-86-10-8315-4745

**Supplemental Table 1: Type of stents and EPDs**

|                | RIPC group | Control group | Sham group | p     |
|----------------|------------|---------------|------------|-------|
|                | N=52       | N=56          | N=54       |       |
| Type of stents |            |               |            |       |
| Wallstent *    | 12 (23.1)  | 12 (21.4)     | 10 (18.5)  | 0.843 |
| Protégé †      | 10 (19.2)  | 9 (16.1)      | 12 (22.2)  | 0.714 |
| Acculink ‡     | 9 (17.3)   | 10 (17.9)     | 9 (16.7)   | 0.986 |
| Precise §      | 21 (40.4)  | 25 (44.6)     | 23 (42.6)  | 0.905 |
| Type of EPDs   |            |               |            |       |
| FilterWire *   | 15 (28.8)  | 14 (25.0)     | 10 (18.5)  | 0.452 |
| Spider †       | 22 (42.3)  | 30 (53.6)     | 29 (53.7)  | 0.404 |
| Accunet ‡      | 6 (11.5)   | 4 (7.1)       | 5 (9.3)    | 0.733 |
| Angioguard §   | 9 (17.3)   | 8 (14.3)      | 10 (18.5)  | 0.828 |

Data are number (%). RIPC indicates remote ischemic preconditioning; and EPDs, embolic protection devices.

\* produced by Boston Scientific Corp (Natick, MA, USA);

† produced by EV3 (Plymouth, MN, USA);

‡ produced by Abbott Vascular (Santa Clara, CA, USA);

§ produced by Cordis (Miami Lakes, FL, USA).

**Supplemental Table 2: Stents sizes**

|                      | RIPC group | Control group | Sham group | p     |
|----------------------|------------|---------------|------------|-------|
|                      | N=52       | N=56          | N=54       |       |
| <b>Length (mm)</b>   |            |               |            |       |
| 30                   | 12 (23.1)  | 14 (25.0)     | 9 (16.7)   | 0.542 |
| 40                   | 37 (71.2)  | 39 (69.6)     | 44 (81.5)  | 0.309 |
| 50*                  | 3 (5.8)    | 3 (5.4)       | 1 (1.9)    | 0.547 |
| <b>Diameter (mm)</b> |            |               |            |       |
| 6                    | 1 (1.9)    | 0             | 1 (1.9)    | --    |
| 7                    | 10 (19.2)  | 5 (8.9)       | 5 (9.3)    | 0.187 |
| 8                    | 12 (23.1)  | 10 (17.9)     | 17 (31.5)  | 0.243 |
| 9                    | 20 (38.5)  | 25 (44.6)     | 19 (35.2)  | 0.587 |
| 10                   | 2 (3.8)    | 5 (8.9)       | 3 (5.6)    | 0.534 |
| Tapered stent †      | 7 (13.5)   | 11 (19.6)     | 9 (16.7)   | 0.690 |

Data are number (%). RIPC indicates remote ischemic preconditioning.

\* All the stents were Wallstent, Boston Scientific Corp, Natick, MA, USA.

† All the stents were 7.0mm-10.0mm taper.

**Supplemental Table 3: Plasma NSE (ng/L)**

|          | RIPC group<br>N=52 | Control group<br>N=56 | Sham group<br>N=54 | p     |
|----------|--------------------|-----------------------|--------------------|-------|
| Baseline | 12.83±3.07         | 12.51±2.93            | 12.12±2.76         | 0.449 |
| Pre-CAS  | 12.63±3.77         | 12.85±3.59            | 12.56±2.71         | 0.901 |
| 1h       | 13.00±2.85         | 13.18±3.98            | 13.01±4.32         | 0.962 |
| 24h      | 12.65±2.78         | 12.97±4.28            | 12.77±3.05         | 0.892 |

Data are mean±SD; RIPC indicates remote ischemic preconditioning; CAS, carotid artery stenting; 1 h, 1 hour after CAS; and 24 h, 24 hours after CAS.

**Supplemental Table 4: Plasma S-100B (pg/ml)**

|          | RIPC group<br>N=52 | Control group<br>N=56 | Sham group<br>N=54 | p     |
|----------|--------------------|-----------------------|--------------------|-------|
| Baseline | 49.64±15.74        | 50.14±17.04           | 50.42±13.62        | 0.966 |
| Pre-CAS  | 49.70±16.25        | 50.75±16.79           | 51.24±13.30        | 0.874 |
| 1h       | 50.99±20.21        | 51.19±22.40           | 51.79±19.42        | 0.979 |
| 24h      | 51.40±16.16        | 52.94±24.34           | 52.02±19.71        | 0.926 |

Data are mean±SD; RIPC indicates remote ischemic preconditioning; CAS, carotid artery stenting; 1h, 1 hour after CAS; and 24h, 24 hours after CAS.

**Supplemental Table 5: Per-protocol analysis of the incidence of new DWI lesion**

|                         | RIPC group | Control group | Sham group | RR(96%CI)                                                      | p     |
|-------------------------|------------|---------------|------------|----------------------------------------------------------------|-------|
|                         | N=52       | N=56          | N=54       |                                                                |       |
| At least one new lesion | 10 (19.23) | 26 (46.43)    | 23 (42.59) | 0.41 (0.15-0.85) *<br>0.45 (0.17-0.90) †<br>1.09 (0.70-1.69) ‡ | 0.007 |

Data are number (%). RIPC indicates remote ischemic preconditioning; RR, relative risk; and CI, confidence interval. \* comparison between the RIPC group and the control group; † comparison between the RIPC group and the sham group; ‡ comparison between the sham group and the control group. New lesion was only diagnosed if increased signal intensity was visible in diffusion-weighted imaging (DWI) and corresponding decreased signal intensity was detected in apparent diffusion coefficient (ADC), and if the lesion was not seen on pre-treatment scan.

Table 5 shows the incidence of new lesion. A total of 27 subjects who did not completely finish the post-CAS MRI follow-up were excluded from the analysis (11 in RIPC, 7 in control and 9 in sham), the final analysis included 52 in the RIPC group, 56 in the control group, and 54 in sham group. We found that the incidence of new DWI lesion in the RIPC group was significantly lower than the other two groups.

**Supplemental Table 6: Per-protocol analysis of clinical events within 6 months**

|                                                    | RIPC group | Control group | Sham group | p     |
|----------------------------------------------------|------------|---------------|------------|-------|
|                                                    | N=48       | N=50          | N=49       |       |
| Stroke/TIA                                         | 1 (2.08)   | 2 (4.00)      | 3 (6.12)   | 0.603 |
| Hemorrhage or hyperperfusion                       | 0          | 1 (2.00)      | 0          | --    |
| All-cause death and ischemic cardiovascular events | 0          | 0             | 0          | --    |

Data are number (%). RIPC indicates remote ischemic preconditioning; TIA, transient ischemia attack.

Table 6 shows clinical events with 6 months. A total of 42 subjects who did not complete the 6 months follow-up were excluded from the analysis (15 in the RIPC group, 13 in the control group and 14 in the sham group), the final analysis included the subjects were 48 in RIPC, 50 in control, and 49 in sham groups. But we found no statistic difference among three groups.

**Supplemental Table 7: Plasma hs-CRP (mg/L)**

|               | Baseline         | Pre-CAS          | 1 h post-CAS     | 24 h post-CAS     |
|---------------|------------------|------------------|------------------|-------------------|
| RIPC group    | 1.13 (0.70-4.69) | 0.97 (0.56-3.71) | 1.60 (0.65-3.65) | 6.76 (3.17-11.81) |
| N=52          |                  |                  |                  |                   |
| Control group | 1.20 (0.63-2.03) | 1.16 (0.61-1.99) | 1.30 (0.65-3.57) | 7.85 (3.73-13.33) |
| N=56          |                  |                  |                  |                   |
| Sham group    | 1.35 (0.82-2.27) | 1.31 (0.52-2.36) | 1.31 (0.76-3.68) | 6.56 (3.48-9.24)  |
| N=54          |                  |                  |                  |                   |
| p             | 0.731            | 0.936            | 0.835            | 0.251             |

Data are medians (IQR); RIPC indicates remote ischemic preconditioning; hs-CRP, hypersensitive C-reactive protein; CAS, carotid artery stenting; 1 h, 1 hour after CAS; and 24 h, 24 hours after CAS.
